# Supplementary material for: The ecology, subsistence and diet of ~45,000-year-old Homo sapiens at Ilsenhöhle in Ranis, Germany
Source: PubMed Central journal article supplement (PMC10927544; doi:10.1038/s41559-023-02303-6), 2024-01-31
Supplement: 41559_2023_2303_MOESM1_ESM.pdf [file 41559_2023_2303_MOESM1_ESM.pdf]

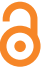

---

# The ecology, subsistence and diet of ~45,000-year-old *Homo sapiens* at Ilsehöhle in Ranis, Germany

---

In the format provided by the  
authors and unedited

# 1 **Table of Contents**

|   |                                                      |                   |
|---|------------------------------------------------------|-------------------|
| 2 | <a href="#">1. Supplementary Tables</a>              | <a href="#">2</a> |
| 3 | <a href="#">2. Supplementary Figure</a>              | <a href="#">2</a> |
| 4 | <a href="#">3. Bulk carbon and nitrogen analysis</a> | <a href="#">3</a> |
| 5 |                                                      |                   |

6 1. Supplementary Tables

7 All Supplementary tables are contained in the associated excel workbook Smith\_et\_al\_SI.

8

9 2. Supplementary Figure

10

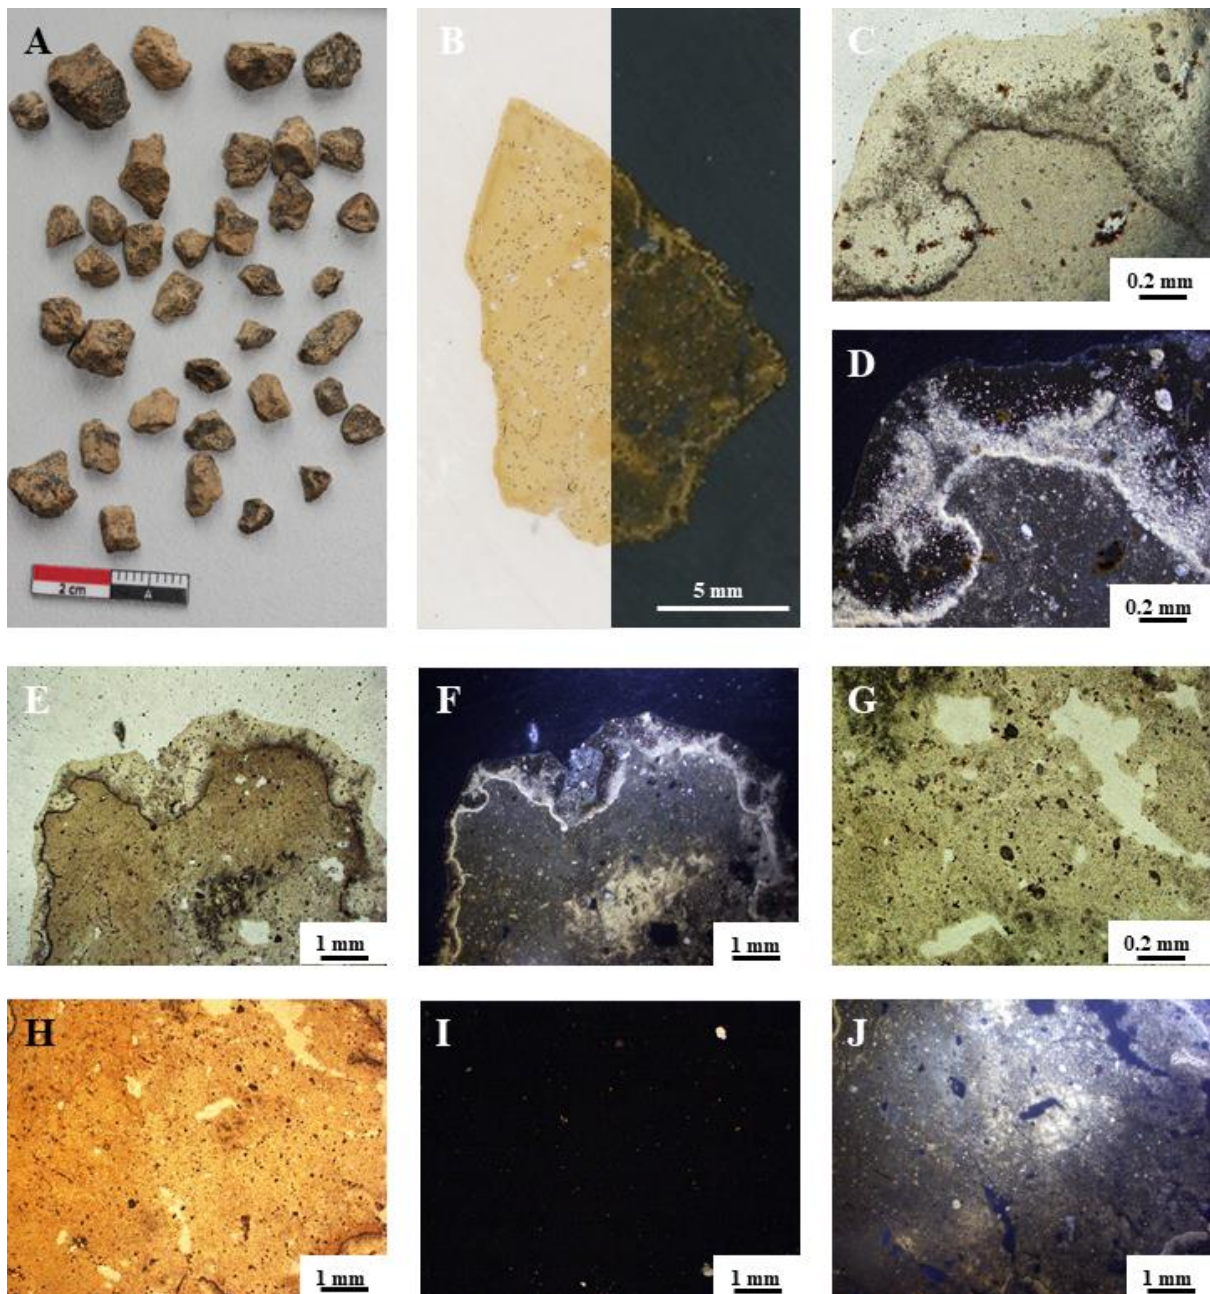

11

12 **Supplementary Figure 1: Micromorphological analyses of a potential carnivore coprolite**  
13 **fragment from cave Ilsenhöhle at Ranis.** Comparison with other micromorphological studies<sup>1-3</sup>  
14 supported this interpretation based on the characteristic presented in this figure. A. Coprolite  
15 fragments from layer 7. B: Scan of the coprolite fragment with closed (left) and open (right) lid  
16 showing a homogenous pale brown to yellow matrix and numerous voids. C to F: The edge of the

17 coprolite shows formation of a weathering rim in plane polarized light (PPL, C&E) and cross  
18 polarized light (XPL, D&F). Note also the inclusion of fine quartz grains G: Voids appear regularly  
19 and mainly present vughs. Typical gas vesicles or digested bone inclusions were not observed in this  
20 specimen. Microphoto in PPL. H to J: Groundmass in PPL (E), XPL (F) and oblique incident light  
21 (OIL, G) The groundmass is a speckled and isotropic.

## 22 3. Bulk carbon and nitrogen analysis

### 23 3.1 Stratigraphical context of the samples analysed for C and N isotopes at Ranis

24  
25 From the 2016-2022 excavation, three *H. sapiens* were excavated from Layer 8 (16/116-159253;  
26 16/116-159327; 16/116-159199), and one from Layer 9 (16/116-159416). Nine *Homo sapiens* bones  
27 from the 1932-1938 excavation were identified in boxes containing material from Layers IX/X  
28 (R10873), X (R10396; R10400; R10355; R10318; R10874), and X/XI (R10875; R10876; R10879), but  
29 all are associated with LRJ Layers 9 and 8 based on their direct <sup>14</sup>C dates<sup>4</sup>. mtDNA analysis indicates  
30 that five of the 13 *H. sapiens* bones may belong to the same or maternally related individuals (16/116-  
31 159327; R10396; R10355; R10874; R10879), although further nuclear DNA analysis is required to  
32 confirm this. Collagen was extracted from ten of the human bones for direct radiocarbon dating and  
33 stable isotope analysis, including four of the linked bones (16/116-159327, R10396, R10874, R10879),  
34 indicating that the human isotopic values presented could represent a minimum of seven individuals.  
35 Myopotamitaki and colleagues<sup>4</sup> extracted collagen from 24 animal bones from Layers 12-7 from the  
36 2016-2022 excavation for radiocarbon dating and Pederzani and colleagues<sup>5</sup> extracted collagen from  
37 14 horse teeth from the 1932-1938 excavation and two horse bones from the 2016-2022 excavation, all  
38 of which were also directly radiocarbon dated. From the equid data published in Pederzani et al<sup>5</sup>, we  
39 include here isotopic data from the specimens with ages overlapping with Layer 7 or older (n = 9).  
40 Carbon and nitrogen isotope ratios for these animals are listed in Extended Data Table 5 along with  
41 their associated layers. Additionally, we extracted collagen from various species found in Layer IX of  
42 the old excavation to provide a more detailed comparative dataset.

### 43 3.2 Diet of herbivorous species at Ranis

44 For Layers 9-7, we observe a separation in the feeding niches of equids compared to cervids, with equids  
45 showing higher  $\delta^{15}\text{N}$  and lower  $\delta^{13}\text{C}$  (Supplementary Figure 2, Supplementary Figure 3). Based on  
46 correlations with other environmental isotope systems, Pederzani et al. (see companion paper)  
47 suggested that this most likely reflects a specialized grazer feeding ecology of equids in a cold steppe  
48 environment. Reindeer, red deer and unidentified cervids show substantially higher  $\delta^{13}\text{C}$  and lower  $\delta^{15}\text{N}$   
49 than equids, while woolly rhinoceros are intermediate between cervids and equids in both carbon and  
50 nitrogen stable isotope values (Supplementary Figure 2, Supplementary Figure 3). Higher  $\delta^{13}\text{C}$  are  
51 expected for ruminant cervids, including reindeer, compared to non-ruminant equids and rhinoceros  
52 due to higher production of isotopically light methane in animals with ruminant digestive physiology<sup>6</sup>.  
53 High  $\delta^{13}\text{C}$  values up to approximately -18 ‰ in reindeer are consistent with lichen consumption, which  
54 is common in reindeer, particularly in open environments and cold climatic episodes<sup>7-10</sup> that favor high  
55 lichen availability. While not as well-adapted to diets including larger amounts of lichen, other cervid  
56 species such as red deer have been documented to feed on lichen, especially during winter or in  
57 particularly cold years<sup>11-13</sup>, explaining their isotopic niche overlap with reindeer in our data. Lichen  
58 consumption by cervids and an absence of any  $\delta^{13}\text{C}$  below -22.5 ‰ support the prevalence of an open  
59 steppe/tundra environment with little woody cover during the LRJ at Ranis<sup>14</sup>, matching well with a cold  
60 climatic episode reconstructed for this time.  
61

62  
 63  
 64  
 65  
 66  
 67  
 68  
 69  
 70  
 71  
 72  
 73  
 74  
 75  
 76

### 3.3 Diets of omnivorous species at Ranis

Bear bones were identified in Layers 9-7 and the low  $\delta^{15}\text{N}$  values of these samples are typical of cave bears<sup>15</sup>. In Layer 8, the red fox has a  $\delta^{15}\text{N}$  value suggesting a carnivorous diet. However, the main prey of the red fox, mostly microfauna and birds, were not analyzed for this study, although some species have been identified throughout the lower horizons at Ranis (see Supplementary Table 2).

### 3.4 Diets of human and carnivorous species at Ranis

Compared to red fox (*Vulpes vulpes*), arctic foxes (*Vulpes lagopus*) show higher  $\delta^{13}\text{C}$  and  $\delta^{15}\text{N}$  values, which suggests a higher intake of meat, possibly from larger prey. Hyenas, wolves, and humans show similar  $\delta^{13}\text{C}$  and  $\delta^{15}\text{N}$  values, with the highest  $\delta^{15}\text{N}$  values associated with humans, as typically observed in Pleistocene European sites<sup>16-18</sup>. Therefore, humans, hyenas, and wolves seem to hunt similar prey, including reindeer, rhinoceroses, and (to perhaps a lesser extent) horses.

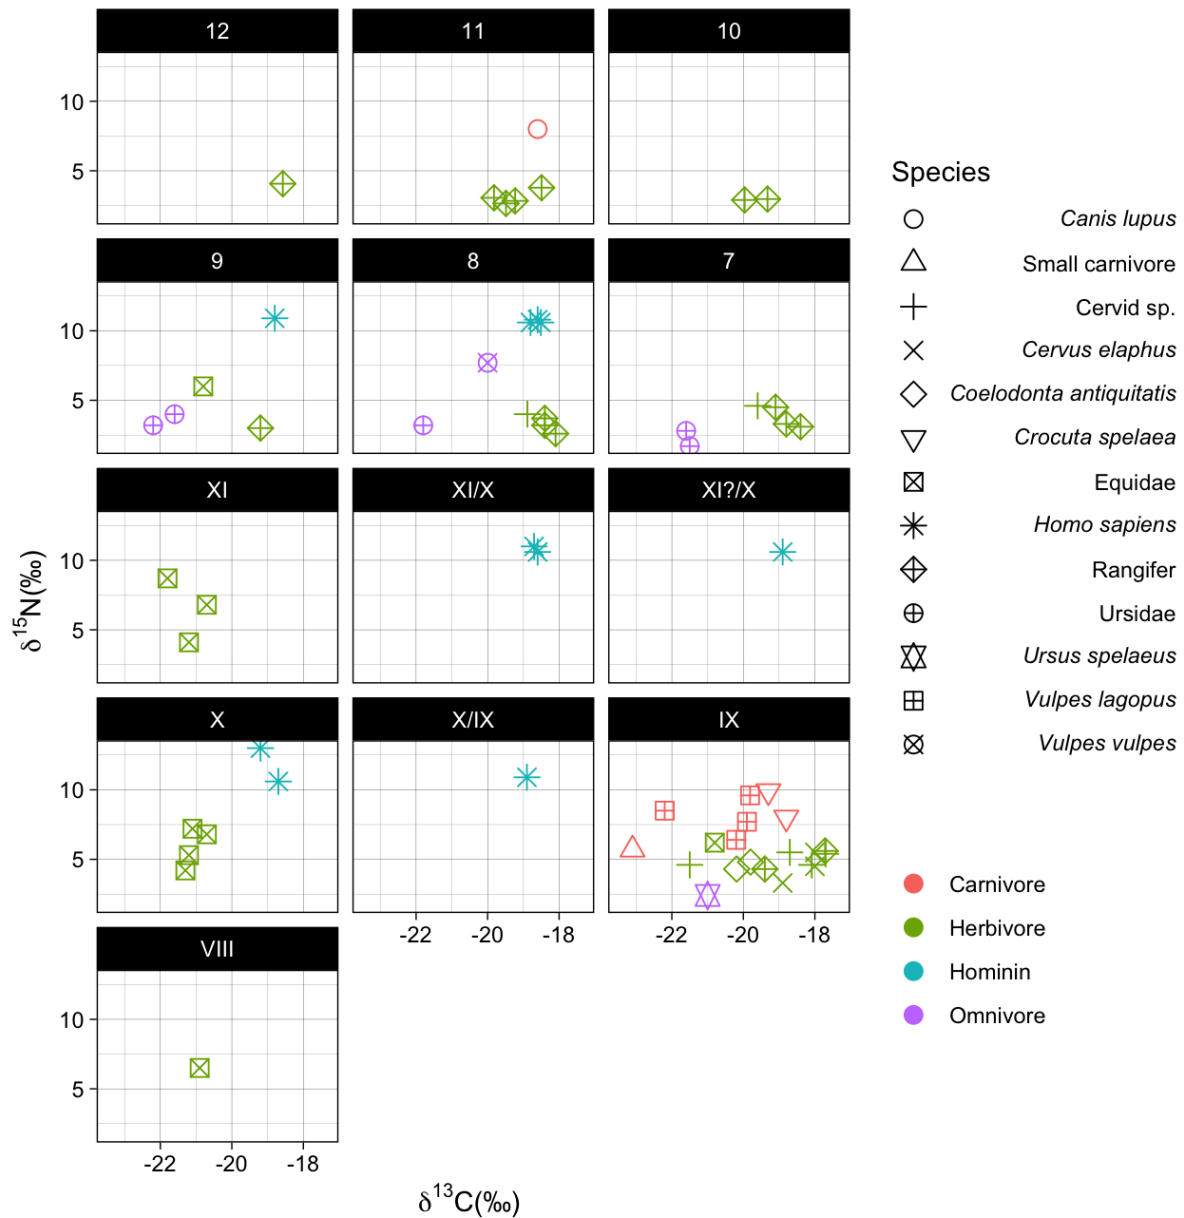

77

78 **Supplementary Figure 2: Carbon and nitrogen isotope values of bulk collagen from Layers 12 -**  
 79 **7 from the 2016-2022 excavation and Layers XI - VIII from the 1932-1938 excavation at Ranis.**  
 80 Where more than one layer is indicated from the 1932-1938 collection (XI/X, XI?/X, X/IX), bones were  
 81 stored in boxes containing material from more than one layer due to the excavation methods used at the  
 82 time.

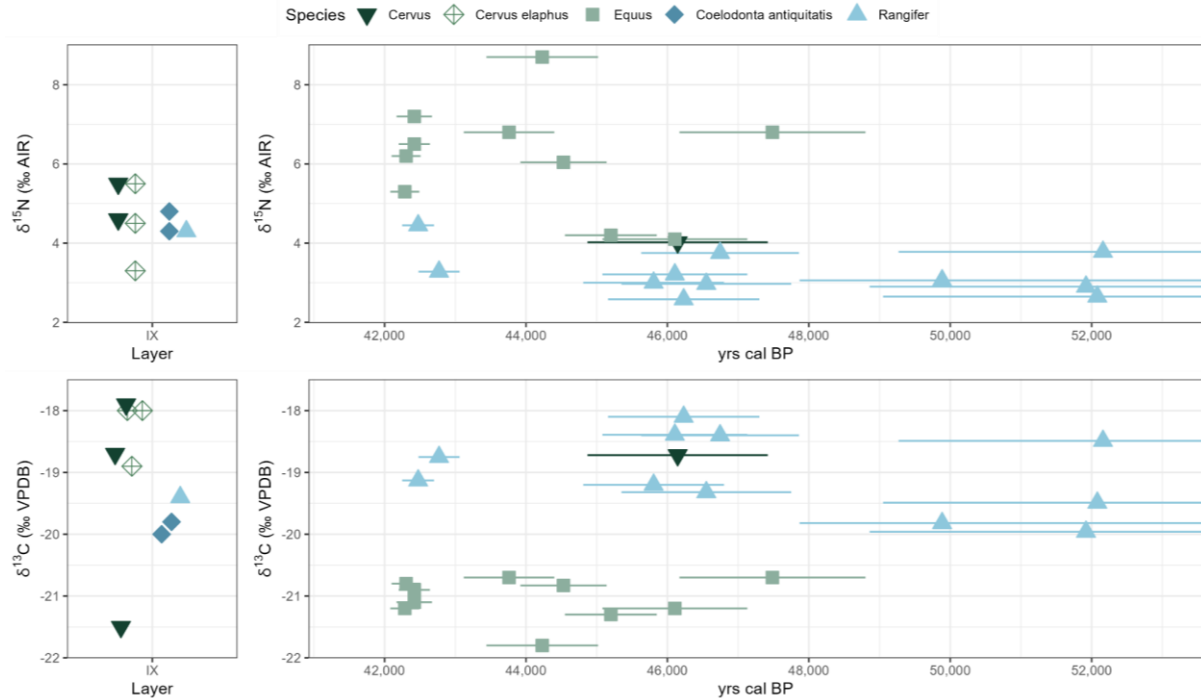

83 **Supplementary Figure 3: Nitrogen isotope values of directly dated herbivore remains over time.**  
 84 Nitrogen isotope values of directly dated herbivore remains are remarkably high, and distinct from other  
 85 species, indicating a specialized grazer feeding ecology. Carbon isotope separation with higher values  
 86 in *Cervus* sp. and *Rangifer* show a stable grouping according to digestive physiology (ruminants vs  
 87 non-ruminants). High  $\delta^{13}\text{C}$  values of cervids suggest a contribution of lichen to the diet. Directly  $^{14}\text{C}$ -  
 88 dated data points (error bars show calibrated age range at 95% probability) from Myopotamitaki et al.  
 89 2023 and Pederzani et al., 2023. Error ranges extending beyond the limit of the calibration curve are  
 90 shown to extend to the limit of the plot without upper age limit. Total number of isotope samples ( $n =$   
 91 33).  
 92  
 93

94 The nitrogen isotope ratios of human bulk collagen at Ranis are quite homogeneous, except for one  
 95 bone sample with a higher  $\delta^{15}\text{N}_{\text{bulk}}$  value of 13‰ (Figure S2, S3;  $\delta^{15}\text{N}_{\text{average}} = 10.9 \pm 0.73\text{‰}$ ,  $n = 10$ ,  
 96 or  $\delta^{15}\text{N}_{\text{average}} = 10.7 \pm 0.17\text{‰}$ ,  $n = 9$ , if individual R10874 is excluded). The elevated nitrogen isotope  
 97 ratios observed in this individual may be attributed to their consumption of breast milk. Breast milk  
 98 consumption is known to be associated with a  $^{13}\text{C}$  enrichment ranging from 0 to 2‰. When considering  
 99 the lower carbon isotope ratio in this individual compared to others in the *H. sapiens* population, several  
 100 factors could contribute to this variance. It is plausible that the nursing parent relied less on reindeer  
 101 meat as a dietary source, or the child may have experienced an extended period of catabolic stress<sup>19,20</sup>.  
 102 Another possibility is that the child's diet consisted of  $^{13}\text{C}$ -depleted and  $^{15}\text{N}$ -enriched foods relative to  
 103 those consumed by adults, such as horses, aquatic food or fermented meat (Figure 6)<sup>21</sup>.

104  
 105 Compared to other hominins from Mousterian, Aurignacian, and Châtelperronian periods, the Ranis *H.*  
 106 *sapiens* have similar  $\delta^{15}\text{N}$  values to Neanderthals, while their  $\delta^{13}\text{C}$  values are similar to those of UP *H.*  
 107 *sapiens* (Supplementary Figure 4A). We however need to look at local associated fauna to properly

108 interpret the diet of the humans, as environmental factors can strongly impact the isotope values of a  
109 food web<sup>22</sup>. UP *H. sapiens* generally exhibit much higher  $\delta^{15}\text{N}$  values than local carnivores, while  
110 Neanderthals have more comparable values<sup>16</sup>, which is interpreted as the signature of freshwater fish  
111 consumption by UP *H. sapiens*. This is not the case at Ranis, where the observed pattern is more similar  
112 to what is usually seen among European Neanderthals (Figure S4 and Supplementary Table 23<sup>17</sup>). The  
113 trophic level enrichment is particularly close to that of contemporaneous Neanderthals from Goyet,  
114 Belgium<sup>23,24</sup> (Supplementary Figure 4), but the local carnivores at Goyet showed lower  $\delta^{15}\text{N}$  compared  
115 to those of Ranis (Supplementary Figure 4E). The trophic level enrichment is also similar to that  
116 observed for one individual of Buran Kaya (Supplementary Figure 4D) and Kostenki. Still, the trophic  
117 level enrichment is high, which could indicate the consumption of enriched  $^{15}\text{N}$  foods such as horses,  
118 rhinos and potentially mammoths. We are also potentially missing foods eaten by these individuals at  
119 other seasonally occupied locations. *H. sapiens* usually exhibit higher  $\delta^{13}\text{C}$  values than associated fauna,  
120 which could be the signature of the contribution of reindeer meat or aquatic foods to their diet. However,  
121 at Ranis, *H. sapiens* exhibit similar  $\delta^{13}\text{C}$  values to the average herbivore values, suggesting the  
122 consumption of all mammal species. At Goyet, the main species contributing to the Neanderthals' diet  
123 were thought to be mammoths, rhinos, and reindeer. A more occasional mammoth consumption at Ranis  
124 could explain why carnivores and *H. sapiens* show closer  $\delta^{15}\text{N}$  values compared to Goyet.

125  
126 Based on the stable isotope analysis of *H. sapiens* bones at Ranis, it is likely that *H. sapiens* from Ranis  
127 consumed terrestrial meat from various mammal species, including rhinos, horses and reindeer, as part  
128 of their regular diet. The similarity in  $\delta^{13}\text{C}$  values between the humans and herbivores suggests that the  
129 humans consumed a variety of mammal species rather than just one or two. Additionally, the trophic  
130 level enrichment of *H. sapiens* at Ranis but also at other locations (Supplementary Figure 4D) is similar  
131 to that of Neanderthals from other sites, suggesting that both groups were consuming similar prey. This  
132 interpretation is in contradiction with the hypothesis that European Palaeolithic *H. sapiens* were  
133 including substantial amounts of freshwater resources in their diet, but is in line with the latest CSIA-  
134 AA data supporting the hypothesis of UP *H. sapiens* diets relying on terrestrial resources<sup>25</sup>.

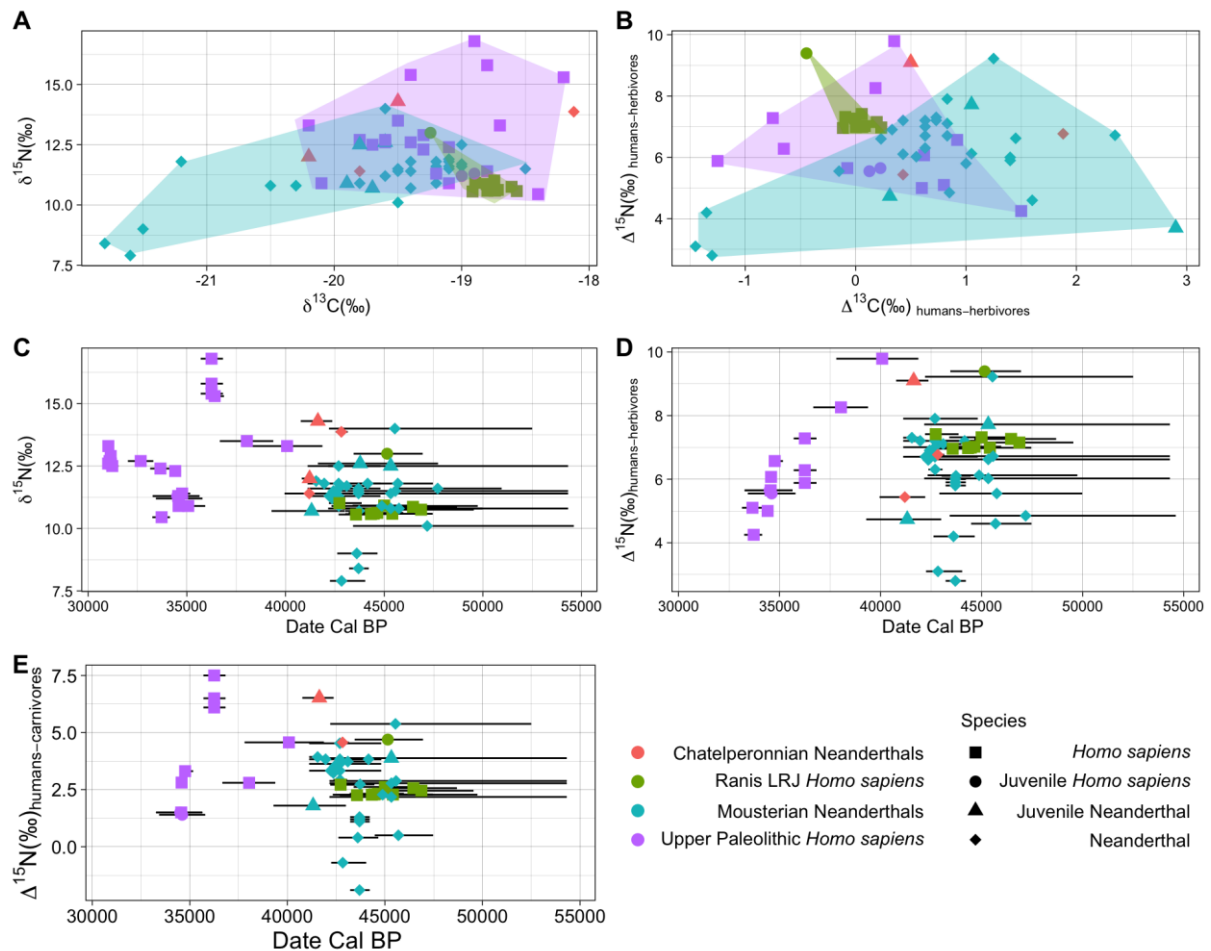

135  
136  
137  
138

139 **Supplementary Figure 4: Carbon and nitrogen isotope ratios of Neanderthals and *Homo sapiens***  
 140 **from European sites >31 ka cal BP.** **A.** Raw carbon and nitrogen isotope ratios **B.** Offset between  
 141 human individuals and associated herbivores for carbon and nitrogen isotope ratios **C.** Raw N isotope  
 142 ratios over time in Aurignacian, Mousterian and Châtelperonnian sites in Europe **D.** Offset between  
 143 human individuals and associated herbivores for nitrogen isotope ratios over time for the same time  
 144 period. **E.** Offset between human individuals and associated carnivores for nitrogen isotope ratios over  
 145 time in Upper Palaeolithic, Mousterian and Châtelperonnian sites in Europe. Number of samples ( $n =$   
 146 66) and see Supplementary Table 23 and 24 for raw data and references. In 4C-4E, the error bars show  
 147 the calibrated age range at 95% probability based on published data.

148  
149  
150

## 151 References

- 152 1. Brönnimann, D., Pümpin, C., Ismail-Meyer, K., Rentzel, P. & Égüez, N. Excrements of  
 153 omnivores and carnivores. *Archaeological soil and sediment micromorphology*.
- 154 2. Horwitz, L. K. & Goldberg, P. A study of Pleistocene and Holocene hyaena coprolites. *J.*  
 155 *Archaeol. Sci.*



- 156 3. Morley, M. W. *et al.* Hominin and animal activities in the microstratigraphic record from  
157 Denisova Cave (Altai Mountains, Russia). *Sci. Rep.* **9**, 13785 (2019).
- 158 4. Dorothea Mylopotamitaki, Marcel Weiss, Helen Fewlass, Elena Irene Zavala, H  l  ne Rougier,  
159 Arev S  mer, Mateja Hajdinjak, Geoff M. Smith, Karen Ruebens, Virginie Sinet-Mathiot, Sarah  
160 Pederzani, Florian Harking, Jesper V. Olsen, Andr   Kirchner, Tobias Lauer, Mareike  
161 Stahlschmidt, Michael Hein, Sahra Talamo, Harald Meller, Holger Dietl, J  rg Orschiedt,  
162 Johannes Krause, Matthias Meyer, Frido Welker, Shannon P. McPherron, Tim Sch  ler, Jean-  
163 Jacques Hublin. Homo sapiens expanded into the northern European Plains by 45ka. *Nature*.
- 164 5. Sarah Pederzani, Kate Britton, Manuel Trost, Helen Fewlass, Nicolas Bourgon, Jeremy  
165 McCormack, Klervia Jaouen, Holger Dietl, Hans-J  rgen D  hle, Andr   Kirchner, Tobias Lauer,  
166 Shannon P. McPherron, Harald Meller, Dorothea Mylopotamitaki, J  rg Orschiedt, H  l  ne  
167 Rougier, Karen Ruebens, Tim Sch  ler, Virginie Sinet-Mathiot, Geoff M. Smith, Sahra Talamo,  
168 Thomas T  tken, Frido Welker, Elena I. Zavala Marcel Weiss, and Jean-Jacques Hublin. Early  
169 Homo sapiens dispersed into cold-arid steppes in central Europe. *Nature Ecology and Evolution*.
- 170 6. Cerling, T. E. & Harris, J. M. Carbon isotope fractionation between diet and bioapatite in  
171 ungulate mammals and implications for ecological and paleoecological studies. *Oecologia* **120**,  
172 347–363 (1999).
- 173 7. Drucker, D. G., Hobson, K. A., Ouellet, J.-P. & Courtois, R. Influence of forage preferences and  
174 habitat use on <sup>13</sup>C and <sup>15</sup>N abundance in wild caribou (*Rangifer tarandus caribou*) and moose  
175 (*Alces alces*) from Canada. *Isotopes Environ. Health Stud.* **46**, 107–121 (2010).
- 176 8. Kristensen, D. K., Kristensen, E., Forchhammer, M. C., Michelsen, A. & Schmidt, N. M. Arctic  
177 herbivore diet can be inferred from stable carbon and nitrogen isotopes in C3 plants, faeces, and  
178 wool. *Can. J. Zool.* **89**, 892–899 (2011).
- 179 9. Drucker, D. G., Bridault, A. & Cupillard, C. Environmental context of the Magdalenian  
180 settlement in the Jura Mountains using stable isotope tracking (<sup>13</sup>C, <sup>15</sup>N, <sup>34</sup>S) of bone collagen  
181 from reindeer (*Rangifer tarandus*). *Quat. Int.* **272–273**, 322–332 (2012).
- 182 10. Rivals, F., Drucker, D. G., Weber, M.-J., Audouze, F. & Enloe, J. G. Dietary traits and habitats  
183 of the reindeer (*Rangifer tarandus*) during the Late Glacial of Northern Europe. *Archaeol.*

- 184 *Anthropol. Sci.* **12**, 98 (2020).
- 185 11. Gebert, C. & Verheyden-Tixier, H. Variations of diet composition of Red Deer (*Cervus elaphus*  
186 L.) in Europe. *Mamm. Rev.* **31**, 189–201 (2008).
- 187 12. Latham, J., Staines, B. W. & Gorman, M. L. Comparative feeding ecology of red (*Cervus*  
188 *elaphus*) and roe deer (*Capreolus capreolus*) in Scottish plantation forests. *J. Zool.* .
- 189 13. Ward, R. L. & Les Marcum, C. LICHEN LITTERFALL CONSUMPTION BY WINTERING  
190 DEER AND ELK IN WESTERN MONTANA. *Wildfire* **69**, 1081–1089 (2005).
- 191 14. Drucker, D. G., Bridault, A., Cupillard, C., Hujic, A. & Bocherens, H. Evolution of habitat and  
192 environment of red deer (*Cervus elaphus*) during the Late-glacial and early Holocene in eastern  
193 France (French Jura and the western Alps) using multi-isotope analysis ( $\delta^{13}\text{C}$ ,  $\delta^{15}\text{N}$ ,  $\delta^{18}\text{O}$ ,  
194  $\delta^{34}\text{S}$ ) of archaeological remains. *Quat. Int.* **245**, 268–278 (2011).
- 195 15. Krajcarz, M. *et al.* Isotopic variability of cave bears ( $\delta^{15}\text{N}$ ,  $\delta^{13}\text{C}$ ) across Europe during MIS 3.  
196 *Quat. Sci. Rev.* **131**, 51–72 (2016).
- 197 16. Richards, M. P. & Trinkaus, E. Isotopic evidence for the diets of European Neanderthals and  
198 early modern humans. *Proceedings of the National Academy of Sciences* **106**, 16034–16039  
199 (2009).
- 200 17. Bocherens, H. Neanderthal dietary habits: review of the isotopic evidence. *The evolution of*  
201 *hominin diets: integrating approaches to the study of Palaeolithic subsistence* (2009).
- 202 18. Jaouen, K. *et al.* Exceptionally high  $\delta^{15}\text{N}$  values in collagen single amino acids confirm  
203 Neandertals as high-trophic level carnivores. *Proc. Natl. Acad. Sci. U. S. A.* **116**, 4928–4933  
204 (2019).
- 205 19. Neuberger, F. M., Jopp, E., Graw, M., Püschel, K. & Grupe, G. Signs of malnutrition and  
206 starvation--reconstruction of nutritional life histories by serial isotopic analyses of hair. *Forensic*  
207 *Sci. Int.* **226**, 22–32 (2013)
- 208 20. Mekota, A.-M., Grupe, G., Ufer, S. & Cuntz, U. Serial analysis of stable nitrogen and carbon  
209 isotopes in hair: monitoring starvation and recovery phases of patients suffering from anorexia  
210 nervosa. *Rapid Commun. Mass Spectrom.* **20**, 1604–1610 (2006)
- 211 21. Speth, J. D. Putrid meat and fish in the eurasian middle and upper paleolithic: Are we missing a

- 212 key part of neanderthal and modern human diet? *PaleoAnthropology*
- 213 22. Stevens, R. E. & Hedges, R. E. M. Carbon and nitrogen stable isotope analysis of northwest  
214 European horse bone and tooth collagen, 40,000BP–present: Palaeoclimatic interpretations.  
215 *Quat. Sci. Rev.* **23**, 977–991 (2004).
- 216 23. Wißing, C. *et al.* Stable isotopes reveal patterns of diet and mobility in the last Neandertals and  
217 first modern humans in Europe. *Sci. Rep.* **9**, 4433 (2019).
- 218 24. Wißing, C. *et al.* Isotopic evidence for dietary ecology of late Neandertals in North-Western  
219 Europe. *Quat. Int.* **411**, 327–345 (2016).
- 220 25. Drucker, D. G. *et al.* Isotopic analyses suggest mammoth and plant in the diet of the oldest  
221 anatomically modern humans from far southeast Europe. *Sci. Rep.* **7**, 6833 (2017).
- 222
